# Supplementary material for: Two-Way Characterization of Beekeepers’ Honey According to Botanical Origin on the Basis of Mineral Content Analysis Using ICP-OES Implemented with Multiple Chemometric Tools
Source: MDPI journal article supplement (doi:10.3390/foods8060210), 2019-06-14
Supplement: s1 [file s1]

## Supplementary Materials

**Table S1.** Level of significance of individual minerals and total mineral content on honey botanical origin as defined by MANOVA

| Minerals | Wilks' Lambda | F      | df1 | df2 | <i>p</i> |
|----------|---------------|--------|-----|-----|----------|
| Al       | 0.306         | 5.899  | 5   | 13  | 0.005    |
| As       | 0.180         | 11.858 | 5   | 13  | 0.000    |
| Ca       | 0.232         | 8.610  | 5   | 13  | 0.001    |
| Mg       | 0.391         | 4.048  | 5   | 13  | 0.020    |
| Mn       | 0.275         | 6.846  | 5   | 13  | 0.002    |
| Ni       | 0.350         | 4.821  | 5   | 13  | 0.010    |
| Pb       | 0.262         | 7.306  | 5   | 13  | 0.002    |
| Sb       | 0.414         | 3.684  | 5   | 13  | 0.027    |
| Si       | 0.370         | 4.429  | 5   | 13  | 0.014    |
| Zn       | 0.067         | 36.063 | 5   | 13  | 0.000    |
| TM       | 0.336         | 5.148  | 5   | 13  | 0.008    |
| B        | 0.464         | 3.003  | 5   | 13  | 0.051    |
| Cu       | 0.527         | 2.330  | 5   | 13  | 0.102    |
| Fe       | 0.594         | 1.780  | 5   | 13  | 0.186    |

F: Fisher's function; df: degrees of freedom; *p*: probability. TM: total minerals.

**Table S2.** Minerals and total mineral content used to build the rotated component matrix<sup>a</sup> along with communalities during extraction

| Minerals | Component |        |        |        | Communalities |
|----------|-----------|--------|--------|--------|---------------|
|          | 1         | 2      | 3      | 4      |               |
| Mg       | 0.941     | 0.101  | 0.154  | 0.253  | 0.983         |
| Ni       | 0.940     |        |        |        | 0.890         |
| Al       | 0.929     | -0.113 | -0.254 |        | 0.941         |
| Mn       | 0.927     | -0.192 | 0.227  | -0.141 | 0.967         |
| TM       | 0.903     |        | 0.292  | 0.302  | 0.997         |
| As       |           | 0.979  | -0.104 | 0.106  | 0.982         |
| Sb       |           | 0.956  |        | -0.152 | 0.947         |
| Pb       | -0.237    | 0.738  |        | 0.402  | 0.766         |
| Ca       |           |        | 0.969  | 0.139  | 0.965         |
| Zn       | 0.229     | -0.531 | 0.761  | -0.186 | 0.948         |
| Si       | 0.218     |        |        | 0.952  | 0.964         |

<sup>a</sup>Extraction method: Principal component analysis. Rotation method: Varimax with Kaiser normalization. Rotation converged in 5 iterations. TM: total minerals. Initial communalities: all variables had the value of 1.000.

**Table S3.** Classification ability of the SDA analysis model used for the botanical origin differentiation of asfaka, cotton, fir, flower, forest flowers, and orange blossom honeys.

| Chemometric technique          | Classification rate | Predicted Group Membership           |                                      |                                    |                                       |                                   |                               |               |
|--------------------------------|---------------------|--------------------------------------|--------------------------------------|------------------------------------|---------------------------------------|-----------------------------------|-------------------------------|---------------|
|                                | Botanical origin    | Flower honey from Aitolokarnania (1) | Asfaka honey from Aitolokarnania (2) | Flower honey from Samos Island (3) | Orange blossom honey from Lakonia (4) | Fir honey from Aitolokarnania (5) | Cotton honey from Larissa (6) | Honey samples |
| Original <sup>a</sup>          | Count               | (1)                                  | 3                                    | 0                                  | 0                                     | 0                                 | 0                             | 3             |
|                                |                     | (2)                                  | 0                                    | 2                                  | 0                                     | 0                                 | 0                             | 2             |
|                                |                     | (3)                                  | 0                                    | 0                                  | 7                                     | 0                                 | 0                             | 7             |
|                                |                     | (4)                                  | 0                                    | 0                                  | 0                                     | 2                                 | 0                             | 2             |
|                                |                     | (5)                                  | 0                                    | 0                                  | 0                                     | 0                                 | 3                             | 3             |
|                                |                     | (6)                                  | 0                                    | 0                                  | 0                                     | 0                                 | 2                             | 2             |
|                                | %                   | (1)                                  | 100.0                                | 0                                  | 0                                     | 0                                 | 0                             | 100.0         |
|                                |                     | (2)                                  | 0                                    | 100.0                              | .0                                    | .0                                | .0                            | 100.0         |
|                                |                     | (3)                                  | 0                                    | 0                                  | 100.0                                 | 0                                 | 0                             | 100.0         |
|                                |                     | (4)                                  | 0                                    | 0                                  | 0                                     | 100.0                             | 0                             | 100.0         |
|                                |                     | (5)                                  | 0                                    | 0                                  | 0                                     | 0                                 | 100.0                         | 100.0         |
|                                |                     | (6)                                  | 0                                    | 0                                  | 0                                     | 0                                 | 100.0                         | 100.0         |
| Cross-validated <sup>b,c</sup> | Count               | (1)                                  | 3                                    | 0                                  | 0                                     | 0                                 | 0                             | 3             |
|                                |                     | (2)                                  | 0                                    | 2                                  | 0                                     | 0                                 | 0                             | 2             |
|                                |                     | (3)                                  | 0                                    | 0                                  | 7                                     | 0                                 | 0                             | 7             |
|                                |                     | (4)                                  | 0                                    | 0                                  | 0                                     | 2                                 | 0                             | 2             |
|                                |                     | (5)                                  | 0                                    | 0                                  | 0                                     | 0                                 | 3                             | 3             |
|                                |                     | (6)                                  | 0                                    | 0                                  | 0                                     | 0                                 | 2                             | 2             |
|                                | %                   | (1)                                  | 100.0                                | 0                                  | 0                                     | 0                                 | 0                             | 100.0         |
|                                |                     | (2)                                  | 0                                    | 100.0                              | 0                                     | 0                                 | 0                             | 100.0         |
|                                |                     | (3)                                  | 0                                    | 0                                  | 100.0                                 | 0                                 | 0                             | 100.0         |
|                                |                     | (4)                                  | 0                                    | 0                                  | 0                                     | 100.0                             | 0                             | 100.0         |
|                                |                     | (5)                                  | 0                                    | 0                                  | 0                                     | 0                                 | 100.0                         | 100.0         |
|                                |                     | (6)                                  | 0                                    | 0                                  | 0                                     | 0                                 | 100.0                         | 100.0         |

<sup>a</sup>. 100.0% of original grouped cases correctly classified. <sup>b</sup>. Cross validation is done only for those cases in the analysis. In cross validation, each case is classified by the functions derived from all cases other than that case. <sup>c</sup>. 100.0% of cross-validated grouped cases correctly classified.

**Component Plot in Rotated Space**

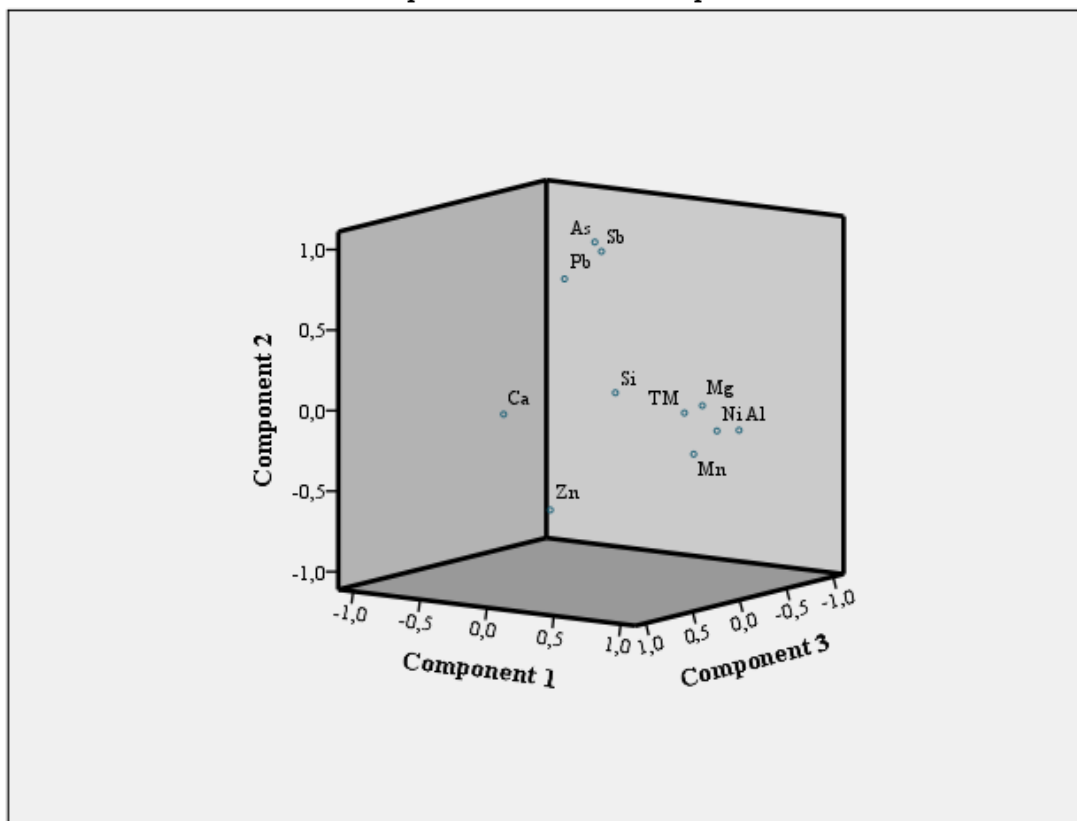

**Figure S1.** Factor analysis highlighting the principal components (structure matrix) used for the botanical origin differentiation of Hellenic asfaka, cotton, flower, fir, forest flowers and orange blossom honeys based on abundant mineral and total mineral contents. Extraction method: Principal component analysis. Rotation method: Varimax with Kaiser Normalization. Figure shows only the first 3 components in dimensional space X, Y, Z. TM: total mineral content.

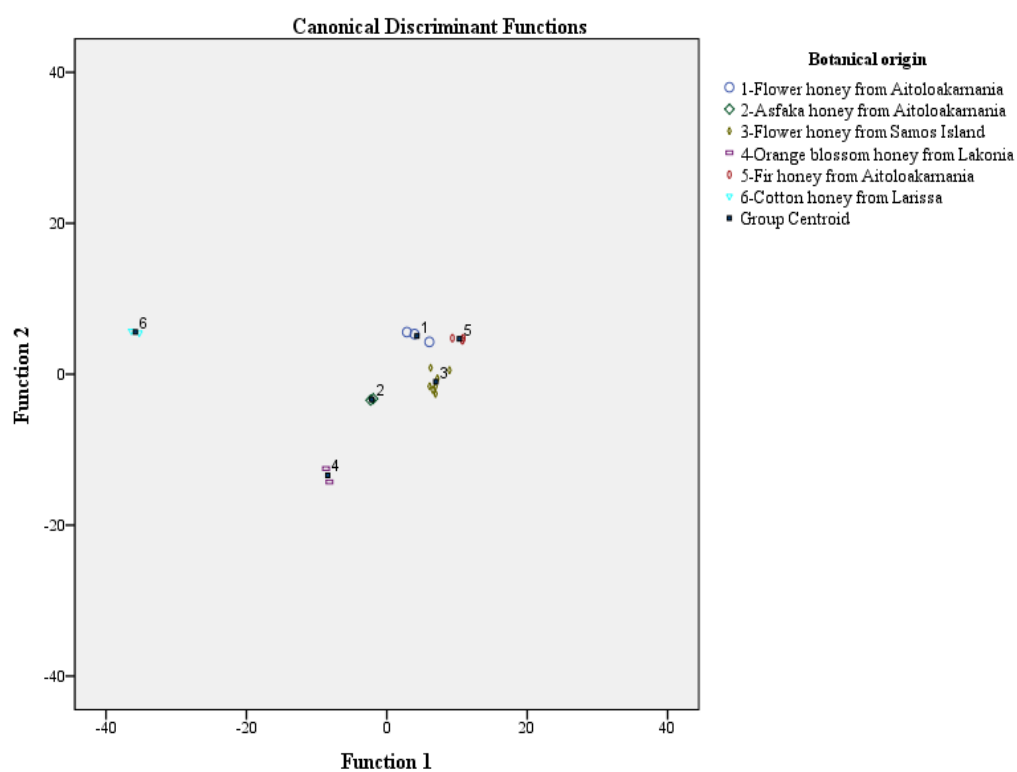

**Figure S2.** Botanical origin differentiation of Hellenic asfaka, cotton, flower, fir, forest flowers and orange blossom honeys based on abundant mineral and total mineral contents and linear discriminant analysis.
